# Supplementary material for: Dosage compensation and sex-specific epigenetic landscape of the X chromosome in the pea aphid
Source: PubMed Central journal article supplement (PMC5471693; doi:10.1186/s13072-017-0137-1), 2017-06-15
Supplement: 13072_2017_137_MOESM1_ESM.pdf [file 13072_2017_137_MOESM1_ESM.pdf]

**Additional file 1: FAIRE and Control libraries coverages.** Number of reads and coverage of X chromosome (X) and autosomes (A) for male and female control libraries.

|                                  | <b>Female Control (AA XX)</b> |             | <b>Male Control (AA X0)</b> |               |
|----------------------------------|-------------------------------|-------------|-----------------------------|---------------|
|                                  | X                             | A           | X                           | A             |
| Number of reads                  | 4 906 829                     | 9 454 084   | 5 304 035                   | 22 708 453    |
| Number of base covered           | 490 682 900                   | 945 408 400 | 530 403 500                 | 2 270 845 300 |
| Size                             | 166 018 072                   | 340 086 956 | 166 018 072                 | 340 086 956   |
| <b>Coverage (expressed in x)</b> | <b>3.0</b>                    | <b>2.8</b>  | <b>3.2</b>                  | <b>6.0</b>    |
