# Supplementary material for: Dosage compensation and sex-specific epigenetic landscape of the X chromosome in the pea aphid
Source: PubMed Central journal article supplement (PMC5471693; doi:10.1186/s13072-017-0137-1), 2017-06-15

**Additional file 3: Mean FAIRE coverage calculated for all autosomal genes (left, black) and X-linked genes (right, grey) for males (blue) and females (red). 99% CI based on 1000 bootstrap is showed around the mean. The FAIRE coverage has been normalized by read-depth in order to allow the comparison between males and females data.**

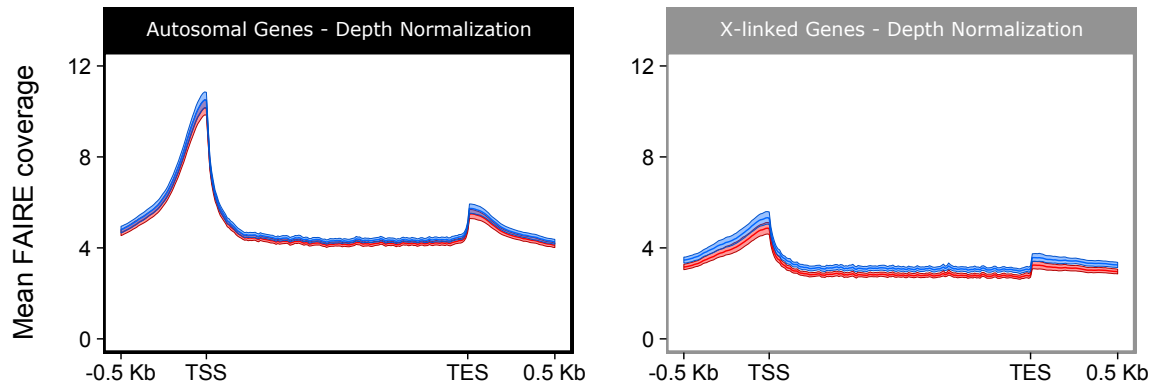

Supplement: 13072_2017_137_MOESM3_ESM.pdf [file 13072_2017_137_MOESM3_ESM.pdf]
