# Supplementary material for: Dosage compensation and sex-specific epigenetic landscape of the X chromosome in the pea aphid
Source: PubMed Central journal article supplement (PMC5471693; doi:10.1186/s13072-017-0137-1), 2017-06-15
Supplement: 13072_2017_137_MOESM5_ESM.pdf [file 13072_2017_137_MOESM5_ESM.pdf]

**Additional file 5: GO enrichment of biological processes for autosomal and X-linked, male and female-biased genes.**

**X-linked male-biased genes GO enrichment.** Enriched Biological Processes GO terms of male-biased X-linked genes with unique *D. melanogaster* homologs (n=235).

| GO term    | Description                                           | P-value  | FDR q-value | Enrichment (N. B. n. b)   |
|------------|-------------------------------------------------------|----------|-------------|---------------------------|
| GO:0003341 | cilium movement                                       | 1.82E-12 | 1.05E-08    | 19.59<br>(5349.13.210.10) |
| GO:0007018 | microtubule-based movement                            | 9.01E-07 | 2.60E-03    | 4.75<br>(5349.75.210.14)  |
| GO:0007017 | microtubule-based process                             | 5.86E-05 | 1.13E-01    | 2.56<br>(5349.209.210.21) |
| GO:0006513 | protein monoubiquitination                            | 5.97E-05 | 8.63E-02    | 25.47<br>(5349.3.210.3)   |
| GO:0046692 | sperm competition                                     | 7.36E-05 | 8.52E-02    | 14.56<br>(5349.7.210.4)   |
| GO:0044706 | multi-multicellular organism process                  | 1.43E-04 | 1.38E-01    | 12.74<br>(5349.8.210.4)   |
| GO:0045814 | negative regulation of gene expression.<br>epigenetic | 3.42E-04 | 2.83E-01    | 5.09<br>(5349.35.210.7)   |
| GO:0040029 | regulation of gene expression.<br>epigenetic          | 6.23E-04 | 4.50E-01    | 3.40<br>(5349.75.210.10)  |
| GO:0044703 | multi-organism reproductive process                   | 8.91E-04 | 5.73E-01    | 8.49<br>(5349.12.210.4)   |

**X-linked female-biased genes GO enrichment.** Enriched Biological Processes GO terms of female-biased X-linked genes with unique *D. melanogaster* homologs (n=182).

| GO term    | Description                                   | P-value  | FDR q-value | Enrichment (N. B. n. b)  |
|------------|-----------------------------------------------|----------|-------------|--------------------------|
| GO:0009886 | post-embryonic animal morphogenesis           | 3.97E-05 | 2.29E-01    | 4.56<br>(5349.309.38.10) |
| GO:0048518 | positive regulation of biological process     | 4.02E-05 | 1.16E-01    | 2.85<br>(5349.790.38.16) |
| GO:0048583 | regulation of response to stimulus            | 9.16E-05 | 1.77E-01    | 3.19<br>(5349.573.38.13) |
| GO:0009653 | anatomical structure morphogenesis            | 1.22E-04 | 1.76E-01    | 2.75<br>(5349.768.38.15) |
| GO:0048522 | positive regulation of cellular process       | 1.40E-04 | 1.61E-01    | 2.88<br>(5349.685.38.14) |
| GO:0010646 | regulation of cell communication              | 1.45E-04 | 1.40E-01    | 3.28<br>(5349.515.38.12) |
| GO:0023051 | regulation of signaling                       | 1.45E-04 | 1.20E-01    | 3.28<br>(5349.515.38.12) |
| GO:0035120 | post-embryonic appendage morphogenesis        | 2.87E-04 | 2.07E-01    | 5.27<br>(5349.187.38.7)  |
| GO:0035114 | imaginal disc-derived appendage morphogenesis | 3.27E-04 | 2.10E-01    | 5.16<br>(5349.191.38.7)  |
| GO:0035107 | appendage morphogenesis                       | 3.95E-04 | 2.28E-01    | 5.00<br>(5349.197.38.7)  |
| GO:0002682 | regulation of immune system process           | 4.00E-04 | 2.10E-01    | 6.03<br>(5349.140.38.6)  |
| GO:0003002 | regionalization                               | 4.46E-04 | 2.15E-01    | 4.90<br>(5349.201.38.7)  |
| GO:0030718 | germ-line stem cell population maintenance    | 5.31E-04 | 2.36E-01    | 10.43<br>(5349.54.38.4)  |
| GO:0009966 | regulation of signal transduction             | 8.96E-04 | 3.70E-01    | 3.12<br>(5349.451.38.10) |

**X-linked unbiased genes GO enrichment.** Enriched Biological Processes GO terms of unbiased X-linked genes with unique *D. melanogaster* homologs (n=517).

| GO term    | Description                      | P-value  | FDR q-value | Enrichment (N. B. n. b)  |
|------------|----------------------------------|----------|-------------|--------------------------|
| GO:0007424 | open tracheal system development | 4.23E-04 | 1.00E+00    | 2.44<br>(5349.81.461.17) |
| GO:0060541 | respiratory system development   | 4.23E-04 | 1.00E+00    | 2.44<br>(5349.81.461.17) |
| GO:0098732 | macromolecule deacylation        | 8.14E-04 | 1.00E+00    | 5.80<br>(5349.10.461.5)  |

**Autosomal male-biased genes GO enrichment.** Enriched Biological Processes GO terms of male-biased autosomal genes with unique *D. melanogaster* homologs (n=598).

| GO term    | Description                                               | P-value  | FDR q-value | Enrichment (N. B. n. b)    |
|------------|-----------------------------------------------------------|----------|-------------|----------------------------|
| GO:0006629 | lipid metabolic process                                   | 8.50E-08 | 4.91E-04    | 2.21<br>(5349.214.532.47)  |
| GO:0044281 | small molecule metabolic process                          | 1.34E-07 | 3.87E-04    | 1.85<br>(5349.374.532.69)  |
| GO:0044710 | single-organism metabolic process                         | 1.83E-07 | 3.52E-04    | 1.54<br>(5349.776.532.119) |
| GO:0055085 | transmembrane transport                                   | 7.74E-07 | 1.12E-03    | 2.14<br>(5349.202.532.43)  |
| GO:0044712 | single-organism catabolic process                         | 2.96E-05 | 3.42E-02    | 2.41<br>(5349.100.532.24)  |
| GO:0042445 | hormone metabolic process                                 | 4.14E-05 | 3.99E-02    | 3.66<br>(5349.33.532.12)   |
| GO:0055114 | oxidation-reduction process                               | 4.20E-05 | 3.47E-02    | 1.86<br>(5349.227.532.42)  |
| GO:0006091 | generation of precursor metabolites and energy            | 1.20E-04 | 8.67E-02    | 2.99<br>(5349.47.532.14)   |
| GO:0006820 | anion transport                                           | 1.49E-04 | 9.58E-02    | 3.26<br>(5349.37.532.12)   |
| GO:0015698 | inorganic anion transport                                 | 2.03E-04 | 1.17E-01    | 3.93<br>(5349.23.532.9)    |
| GO:0044255 | cellular lipid metabolic process                          | 2.36E-04 | 1.24E-01    | 1.95<br>(5349.155.532.30)  |
| GO:0006082 | organic acid metabolic process                            | 3.93E-04 | 1.90E-01    | 1.77<br>(5349.204.532.36)  |
| GO:0044262 | cellular carbohydrate metabolic process                   | 4.15E-04 | 1.85E-01    | 3.35<br>(5349.30.532.10)   |
| GO:0006865 | amino acid transport                                      | 4.22E-04 | 1.74E-01    | 3.62<br>(5349.25.532.9)    |
| GO:0030239 | myofibril assembly                                        | 5.15E-04 | 1.99E-01    | 5.03<br>(5349.12.532.6)    |
| GO:0006099 | tricarboxylic acid cycle                                  | 5.72E-04 | 2.07E-01    | 3.83<br>(5349.21.532.8)    |
| GO:0044282 | small molecule catabolic process                          | 5.92E-04 | 2.01E-01    | 2.61<br>(5349.54.532.14)   |
| GO:0015849 | organic acid transport                                    | 8.08E-04 | 2.60E-01    | 3.35<br>(5349.27.532.9)    |
| GO:0006979 | response to oxidative stress                              | 8.41E-04 | 2.56E-01    | 2.43<br>(5349.62.532.15)   |
| GO:0032787 | monocarboxylic acid metabolic process                     | 8.64E-04 | 2.50E-01    | 2.28<br>(5349.75.532.17)   |
| GO:0043648 | dicarboxylic acid metabolic process                       | 8.77E-04 | 2.41E-01    | 4.64<br>(5349.13.532.6)    |
| GO:0006121 | mitochondrial electron transport. succinate to ubiquinone | 9.79E-04 | 2.57E-01    | 10.05<br>(5349.3.532.3)    |

**Autosomal female-biased genes GO enrichment.** Enriched Biological Processes GO terms of female-biased autosomal genes with unique *D. melanogaster* homologs (n=1107).

| GO term    | Description                                      | P-value  | FDR q-value | Enrichment (N. B. n. b)      |
|------------|--------------------------------------------------|----------|-------------|------------------------------|
| GO:0002181 | cytoplasmic translation                          | 2.75E-32 | 1.59E-28    | 4.31<br>(5349.74.1023.61)    |
| GO:0006807 | nitrogen compound metabolic process              | 1.69E-20 | 4.89E-17    | 1.52<br>(5349.1144.1023.332) |
| GO:0034641 | cellular nitrogen compound metabolic process     | 1.80E-20 | 3.46E-17    | 1.56<br>(5349.1020.1023.304) |
| GO:0022402 | cell cycle process                               | 4.88E-17 | 7.05E-14    | 1.89<br>(5349.401.1023.145)  |
| GO:0090304 | nucleic acid metabolic process                   | 1.85E-15 | 2.14E-12    | 1.62<br>(5349.672.1023.208)  |
| GO:0051298 | centrosome duplication                           | 2.61E-13 | 2.51E-10    | 3.56<br>(5349.47.1023.32)    |
| GO:0009059 | macromolecule biosynthetic process               | 1.59E-12 | 1.32E-09    | 1.74<br>(5349.399.1023.133)  |
| GO:0031023 | microtubule organizing center organization       | 2.18E-12 | 1.58E-09    | 2.73<br>(5349.88.1023.46)    |
| GO:0034645 | cellular macromolecule biosynthetic process      | 2.69E-12 | 1.73E-09    | 1.79<br>(5349.354.1023.121)  |
| GO:0006139 | nucleobase-containing compound metabolic process | 4.14E-12 | 2.39E-09    | 1.48<br>(5349.789.1023.224)  |
| GO:1901360 | organic cyclic compound metabolic process        | 4.43E-12 | 2.33E-09    | 1.45<br>(5349.883.1023.245)  |
| GO:0006412 | translation                                      | 7.71E-12 | 3.71E-09    | 2.16<br>(5349.172.1023.71)   |
| GO:0051297 | centrosome organization                          | 1.03E-11 | 4.58E-09    | 2.71<br>(5349.85.1023.44)    |
| GO:0006396 | RNA processing                                   | 1.16E-11 | 4.79E-09    | 1.83<br>(5349.306.1023.107)  |
| GO:0043043 | peptide biosynthetic process                     | 1.26E-11 | 4.87E-09    | 2.13<br>(5349.177.1023.72)   |
| GO:0032502 | developmental process                            | 1.28E-11 | 4.61E-09    | 1.27<br>(5349.1787.1023.434) |
| GO:0016071 | mRNA metabolic process                           | 1.30E-11 | 4.42E-09    | 1.97<br>(5349.231.1023.87)   |
| GO:1903047 | mitotic cell cycle process                       | 1.38E-11 | 4.44E-09    | 1.90<br>(5349.261.1023.95)   |
| GO:0006725 | cellular aromatic compound metabolic process     | 1.47E-11 | 4.46E-09    | 1.45<br>(5349.856.1023.237)  |
| GO:0016070 | RNA metabolic process                            | 1.68E-11 | 4.87E-09    | 1.60<br>(5349.522.1023.160)  |
| GO:0046483 | heterocycle metabolic process                    | 2.30E-11 | 6.32E-09    | 1.45<br>(5349.828.1023.230)  |
| GO:0043604 | amide biosynthetic process                       | 2.39E-11 | 6.28E-09    | 2.10<br>(5349.179.1023.72)   |

**Autosomal unbiased genes GO enrichment.** Enriched Biological Processes GO terms of unbiased autosomal genes with unique *D. melanogaster* homologs (n=2805).

| GO term    | Description                                                    | P-value  | FDR q-value | Enrichment (N. B. n. b)      |
|------------|----------------------------------------------------------------|----------|-------------|------------------------------|
| GO:0051179 | localization                                                   | 7.61E-07 | 4.40E-03    | 1.14<br>(5349.1063.2508.569) |
| GO:0006810 | transport                                                      | 1.66E-06 | 4.80E-03    | 1.15<br>(5349.910.2508.491)  |
| GO:0051234 | establishment of localization                                  | 7.24E-06 | 1.40E-02    | 1.14<br>(5349.945.2508.504)  |
| GO:0006898 | receptor-mediated endocytosis                                  | 1.94E-05 | 2.80E-02    | 1.73<br>(5349.37.2508.30)    |
| GO:0007264 | small GTPase mediated signal transduction                      | 6.54E-05 | 7.57E-02    | 1.44<br>(5349.89.2508.60)    |
| GO:0072583 | clathrin-dependent endocytosis                                 | 6.71E-05 | 6.47E-02    | 1.73<br>(5349.32.2508.26)    |
| GO:0035556 | intracellular signal transduction                              | 1.08E-04 | 8.90E-02    | 1.26<br>(5349.221.2508.131)  |
| GO:0016192 | vesicle-mediated transport                                     | 1.39E-04 | 1.01E-01    | 1.20<br>(5349.355.2508.200)  |
| GO:0048488 | synaptic vesicle endocytosis                                   | 2.05E-04 | 1.32E-01    | 1.71<br>(5349.30.2508.24)    |
| GO:0099643 | signal release from synapse                                    | 3.78E-04 | 2.19E-01    | 1.40<br>(5349.82.2508.54)    |
| GO:0001505 | regulation of neurotransmitter levels                          | 3.85E-04 | 2.02E-01    | 1.38<br>(5349.91.2508.59)    |
| GO:0023061 | signal release                                                 | 4.17E-04 | 2.01E-01    | 1.40<br>(5349.84.2508.55)    |
| GO:0099003 | vesicle-mediated transport in synapse                          | 4.35E-04 | 1.93E-01    | 1.55<br>(5349.44.2508.32)    |
| GO:0006464 | cellular protein modification process                          | 5.41E-04 | 2.24E-01    | 1.14<br>(5349.601.2508.320)  |
| GO:0036211 | protein modification process                                   | 5.41E-04 | 2.09E-01    | 1.14<br>(5349.601.2508.320)  |
| GO:0099531 | presynaptic process involved in chemical synaptic transmission | 6.48E-04 | 2.34E-01    | 1.38<br>(5349.85.2508.55)    |
| GO:0070647 | protein modification by small protein conjugation or removal   | 7.97E-04 | 2.71E-01    | 1.29<br>(5349.139.2508.84)   |
| GO:0007269 | neurotransmitter secretion                                     | 9.15E-04 | 2.94E-01    | 1.39<br>(5349.75.2508.49)    |
