# Supplementary material for: Dosage compensation and sex-specific epigenetic landscape of the X chromosome in the pea aphid
Source: PubMed Central journal article supplement (PMC5471693; doi:10.1186/s13072-017-0137-1), 2017-06-15
Supplement: 13072_2017_137_MOESM6_ESM.pdf [file 13072_2017_137_MOESM6_ESM.pdf]

**Additional file 6: Protein sequence comparison of the Drosophila's DCC in the pea aphid.** CLUSTAL multiple sequence alignment by MUSCLE (3.8) of *A. pisum*'s homologs of *D. melanogaster* DCC. Proteic domains of the Drosophila are represented in full color boxes above the alignments. *A. pisum* gene names found by BLASTp are indicated in parenthesis.

### MSL1 (XM\_003243415.1)

```

MSL1_DROME      MDKRFKWPFKRANYLESYPHIPSRGRQRNLHGHPNQTOHLHQHPGKIYERQQYGNRG
MSL1_ACYPI      MARR-----RNSRGVGRA
                *  .*                               *:  *  **
MSL1_DROME      GHGGGNNNYRKLHSLPAEHGGGAMAPPSSGGTVCAGADMVKLISENNNLRMVMLNINL
MSL1_ACYPI      -----
MSL1_DROME      MQEQTDSIAAKDKELDDQSAKMSVVKAQNEELKQAVAQLEAANQELCKQLRRKNQRRNDN
MSL1_ACYPI      -----SAMSKEKDEK-----
                :*  .**  *::
MSL1_DROME      DDDDDPPLPPAAPQQKLIRCHAETQTVFREREQGTQTIDAQPQFANALPRGINMKESPA
MSL1_ACYPI      -----
MSL1_DROME      LDHHAGAVTNQPASKRSESKGRGEFNGKKVSTFILQRMNQDFEHHIHEQTEVAEEHEMEA
MSL1_ACYPI      -----IL-----
                **
MSL1_DROME      HKEQISQEEEDQLVAEEDHLHMQEVHTEEVVGGDIFHDALESIEMEVVTEELVDMEEHGQS
MSL1_ACYPI      ---QLTNEVEYLKQKSDVLSFTQVSS-----
                *:::*  : *  :.*  *  : : *  :
MSL1_DROME      VDANGHIEEDDEDEDEDDENSDKDDDSEDDYPWMHSDADVNARTEELWQNQNYLLELD
MSL1_ACYPI      -----
MSL1_DROME      PTEEKTCAPSAHSTPNHQKSSQAEIRKEGNQNRITEKLLQLKPEPMVDALEAPILPKW
MSL1_ACYPI      ----TCSS-----
                **:.
MSL1_DROME      VAFKKKDKHEHESVPESPEVPKQQPHQEDAIVDHNAIKNQLEVPKPDLPKDPKDEQRQD
MSL1_ACYPI      -----GIGDLSLAEKQYQOEHQHIKPK-----
                .*  *  .  ::*  :  :  :***
MSL1_DROME      GQLDVRVEPQEDVRKVQKETLKRQPEDAPKHLPKAVAPKVTKTSSRESTLPKANTADIKD
MSL1_ACYPI      -----KRTIRQAATKQPNPDP-----LESNQTKRRRTSIPQTKSAKLKN
                ...  .::  ..**:*  *  :  :.*  *  :::*::*:.*:
MSL1_DROME      APAQKVIANHQSTKT---QTDPVKTQRLQVKIRQYEMHPDMRTGSSAPSDIRKQKNVDPV
MSL1_ACYPI      TEELSLITADDAYYTCLGSYDPIKS-----NPV
                :  .:*:  :  *  .  ***:
MSL1_DROME      STPETKTIKSKSMLVNDKKTSETSQSPDQEI DVETVRRKLAEHLKKEKLSQSHSSQVTL
MSL1_ACYPI      SKNTKRNI-----
                *  .  ...*
MSL1_DROME      KKIRERVATNLIYPPPSAPVSSTTITPAPTPTPTPTPGSTPQHAVTSSMDQEISAASKS
MSL1_ACYPI      -----
MSL1_DROME      KAAEQIATPLTPQSNSSVSSTTSTIRKTLNNCSPHTYSKATARSGLQSRFRATATFPYST
MSL1_ACYPI      -----

```

MSL1\_DROME RTWEDQEFHCDNEFFLEEADPELLADNPSLEIPKWRDVPVPPSSDKIDTELLSDATFERRH  
MSL1\_ACYPI -----EIPNYRLKKYSCRNSAKGIELMSDAIFQKRH  
\*\*\*:\* . . . \*\*:\* \*\* \*:\*

PEHE  
MSL1\_DROME QKYVKDEVDRKCRDARYMKEQIRLEQLMRRNQDEVIVALDPLRA--STFYPLPEDIEAI  
MSL1\_ACYPI FKHERSEQICKRRDLRQIRELIRVENLRKGRNKHHSQKSNNDNNKEELTLLPSPSNIKSI  
\* : ..\* \* \* \* \* :.\* \*\*:\* \*\* \* \* : \* . : \* : \* \* . : \* \*

MSL1\_DROME QFVNEVTVQAFGENVVNMEARDDFGVPWVDAIEAPTSIARSKALAEPVATLASKKIPTTA  
MSL1\_ACYPI EITNKLPVSAFGINLYRLTC-----  
:.\*:.\*.\* \*\* \* : . : .

MSL1\_DROME AEARHQENHSSYVFPKRRKRQKNR  
MSL1\_ACYPI -----

## MSL2 (ACYPI49193)

MSL2\_DROME MAQTAYLVKTRIAMRSASNLKRRVEELNSGLGELRQLLSCVCCQLL--VDPYSPKGRK  
MSL2\_ACYPI MALIEYYLSTSQIVLQAKSTDPLTWQKLHSLPLLEHLSCQVCHKLVDRNLNPNY-----  
\*\* \* \* : . \* . . :.\* \* \* \* : \* : \* \* \* \* : \* : \* \* \*

zf-RING10  
MSL2\_DROME CQHNVCRLCLRGKKHLFPSTQCEGCSDFKTYEENRMMAAQLLCYKTLVHLLHSALFGE  
MSL2\_ACYPI LDGYACTVCVNHQITENPS-----SAIIQCYKKLCAYIHSSPLYKV  
: . \* : \* : : \* \* : \* : \* \* . \* : : \* . \* :

MSL2\_DROME LAGMRPQVARELVPRIKLPPKTTQEFIREGSNISDTFDIFLPQPDLPFLKDMPTSLPAET  
MSL2\_ACYPI MC-----TRVEDKRLVELVTE-----  
: . : \* \* \* : \* \*

MSL2\_DROME PPTSAVTTPPELPHYDHLNIDIEAEAAATAEQGHFSPPLPLPTGSRMGMLSHAGQIVIAI  
MSL2\_ACYPI -----VISL  
\*\* :

MSL2\_DROME ESSESGFMDQAWTDQVDSGTVSVSKYTNNGNFAVSVMPTSATTKFDPQELQIGQVVQ  
MSL2\_ACYPI PRSINGY-----SGMVN-----GTVIK  
\* . \* : \* \* \* . \* \* : \* \* :

MSL2\_DROME MADSTQLAVLAAVEETVETSTQLTVLSTTVEETVETSTQLEVLTSAEEPNEISDQLANLQ  
MSL2\_ACYPI QEKK-----EKDIEDDSTLMVNGTMNKQEI-----  
.. \* : \* \* . : \* \* \* \* : \* : :

MSL2\_DROME VEESDEALVEETVEEAEGTSSIPSEVVAEHMEEDQHLVDVHTSQSPTQTEMEEAVEEHVATK  
MSL2\_ACYPI ---EEDIEDDSTLMVNGTMNKQEIKEEDIEDDFTLMVNGIMNKQEIKEENSKDDI---  
\* : : \* : . : \* \* . \* : \* \* \* \* : . : : \* : : :

MSL2\_DROME TQLGHVQTELQDAESLQKDFEDAKAAAEAKEKEKDLHAISAELQKEDSDEPTLKRKRTR  
MSL2\_ACYPI TLISSDIQLPTVNETPEDYINYQIFDVQSQ-----  
\* : . : \* : . . : \* : : : : :

MSL2\_DROME TLKASQAAKIEPVPSEVKTQVSGKALRRIRGKDKEEKVPPKPKCRCGISGSSNTLTT  
MSL2\_ACYPI -----KHKIQN-QSVFNIPKKNKNER---RWGCRCGNATTPGKLT  
\* \* \* . : . : . \* \* \* . \* \* \* : : \* \*

MSL2-CXC  
MSL2\_DROME CRNSRCPCYKSYNSCAGHCVCCKNPHKEDYVESDEDDLEDFEMPDKVPEPMTQSEEPV  
MSL2\_ACYPI CFGQRCPCYTEQKPCDQCKCRGNPRQK---RSNNDNLE-----  
\* . \* \* \* \* . : \* \* \* \* . : \* \* \* \* \* :

MSL2\_DROME VAEPRQEENSMAPPDSSAPISLVPLNNLQQSQHPLVLVQNEKGEYQGFNIFQGSKPLDPV  
MSL2\_ACYPI IDQIRRK-----PVTLELVSSLKPSH-----NNSNSLFSAYTMHD-----  
: : \*.: \*:\* :..\*:\* \*.\* :\*... :...:..:

MSL2\_DROME TVGFTIRVQLQHTDGFGLPQYAYIMPTIDPPNPPAPSLSPPPPPADREVIEPPAKKFR  
MSL2\_ACYPI MLQFS-----SHSQQFD-----  
: \* : .\*: : \*

MSL2\_DROME TSTRTRRGRANFSALDTVDELVSGGSRNSAAGDRSSATDNAHSLFEEIMSGSDDL  
MSL2\_ACYPI -----QGGTEDN-----LGHVNSIFHSP-----  
.\*\*: .\* :...:\*\*

### MSL3 (ACYPI000966)

MSL3\_DROME MTELRDET-PLFHKGEIVLCYEPDKSKARVLYTSKVLNVFERRNEHGLRFYEYKIHFQGW  
MSL3\_ACYPI MAAKKVLTKSKFEEGEKVLVLCYEPDPAKTKVLYDSKVLRVVPEKDEQGRKFKFLIHFQGW  
\*: . \* . \* :\*\* \*\*\*\*\* :\*:.\*\*\* \*\*\*,\* . :\*: \* . \* : \*\*\*\*\*

MSL3\_DROME RPSYDRCVRATVLLKDEENRQLQRELAEAAKLQIRGDYSYKGTDPKPSAKKKRGGKAAH  
MSL3\_ACYPI NSTWDRFVTDEFILKDEENRKLQKELAEAAQLTPGGNL-YRKKRKRRAVKLE---PKPL  
...:\*\* \* . :\*\*\*\*\*:\*\*.\*\*\* \*:\* \* : \* . \* . \* :\* : .

MSL3\_DROME VEEPIVVPMDTGHLEAEHEMAPT PRAAGNRTRDNSGGKRKEKPPSGDGRLLKGNRGRQTET  
MSL3\_ACYPI VIEPAVVTIDDKSM-VENENVPVP-----  
\* \*\* \*\*\*.:\* : .\*: \* .\*.\*

MSL3\_DROME FYNNAINDVSVYNHVPQEDRIMMRVSERLRELIYDRNMIKVLGKQHALPARVPIVTIME  
MSL3\_ACYPI -----IDTI-----LLPKRRLPDLEFPDNLKFHTGYNCYLVHEKNTLVQLPCQPNVVTLE  
\* : : \* : : ..:.\* \* : : : . . \*\*.. :\*\*:\*

MSL3\_DROME NFVKQQAVELAISIKQDSSRARNTQSRNARMEREYDRVMSTVCMLKEVVDGLRIYFEFHV  
MSL3\_ACYPI SYLRYLARNNFSDNKTTKKKRQPEVLDKQLEKRY-----IICV--EVL DGLRICFNTFL  
... \* : . \* ... : :\*. \* :\* : \*\*.\*\*\* \* : . :

MSL3\_DROME DDHLLYTEEKE---YVHNYLTDDNMRNCSLILNKSYEYINPSGDTELIGLDGTPVVEGSG  
MSL3\_ACYPI FRKLLVNEDEQAQYEAALKVTLQPPVNNIIPQNGEQDYDNVPNDEESESHDNKNNVKAKR  
:\*\* .\*: : \* : \* : \* . \* \* ..\* \* . \*.. \* : .

MSL3\_DROME DTNGQIGVINIGGPEYEQQLQKCLLYIVTAS--GKNTAQAYERTSPYTAAYKLPVEMRGF  
MSL3\_ACYPI DNTRS-----STSQYASSQOTCSDCSLTKSQCSKIVKDTFEKARD-----EY  
\* . . . . :\* . . \*.\* :\* \* . \* . :\*: : :

MSL3\_DROME LNETFKWRLLS---AESPEKSMVFGAPHLVRLMIKMPMFLNASPISNKKLEDLLPHLD  
MSL3\_ACYPI VSKADSWKAVPDSAYDEEIKQPAVVYGVYHLLRLLLENLPKILANTEVDGEKLSIVYLYSN  
: : : .\*. : . \* : :\*:\*. \*\*:\* : \* : \* : : :\*\* . : : :

MSL3\_DROME AFINYLENHREWFDRNFVNSTALPQEDLQRELLDSL DGI AA  
MSL3\_ACYPI GLLKYLSTQTYLFGMQYVKNEMEDAVKSSAPIRNRHNRHKN  
: : :\*\*..: \* . : :\* . . . : : :

**MOF (ACYPI002102)**

MOF\_DROME MSEAELEQTPSAGHVQEIQPIEEEHEPEQEPTDAYTIGGPPRTPVEDAAAELSASLDVSGS  
MOF\_ACYPI -----MVVHHSATSVSMEVD-----  
\* :\*:.\* :.\*

MOF\_DROME DQSAEQSLDLGSGVQAEAAAASEPPAKRQHRDISPISEDSTPASSTSTSSSTRSSSSRYDD  
MOF\_ACYPI -----

MOF\_DROME VSEAEAPPEPEPEPEQPPQQQQEKKEDGQDQVKS PGPVELEAQEPAQPQKQKEVVDQEIE  
MOF\_ACYPI -----

MOF\_DROME TEDEPSSDTVICVADINPYGSGSNIDDFVMDPDAPPNAIITEVVTIPAPLHLKGTQQLGL  
MOF\_ACYPI -----

MOF\_DROME PLAAPPPPPPPPAEQVETPASPTDDGEEPPAVYLSPIRSRYMQESTPGLPTRLAPRD  
MOF\_ACYPI -----PPRNANSPDDPKT-----  
\*\* : \* : \* :

MOF\_DROME PRQRNMPPPAVVLPIQTVLSANVEAISDDSETSSSSDDDEEEEEDEDDALTMEDHNTSRE  
MOF\_ACYPI -----ANGSSENEKAEDSESEDG-----  
: : .\*\*\*. . . : \* . \* . \* . :

Tudor-knot

MOF\_DROME TVITTGDPMLQKIDISENPKIYFIRREDGTVHRGQVLQSRTTENAAAPDEYYVHYVGLN  
MOF\_ACYPI -----PLDVGEH----YLVRRYDDSWHPAEVLHTRFNDTEHLF-EYYVHYEGYN  
\*: : \* : \* : \* : \* : \* : \* : \* : \* : \* : \* : \* : \* : \* : \* : \*

MOF\_DROME RRLDGWVGRHRISDNADDLGGITVLPAPPLAPDQPSTSRRELAQQAAAAAASSERQKRA  
MOF\_ACYPI RRLDQWVPRDRIMNSRFDI-----SEKNWKQKD  
\*\*\*\* \* \* \* \* \* : . \* : : . . . . . :

MOF\_DROME ANKDYLYSVCENSRYDYSDRKMTRYQKRRYDEINHVQKSHAELTATQAALKEKEHEHITKI  
MOF\_ACYPI VNKNLDEL-----LNQSDRKITRNQKRRHDEINHVPMSYAEMDPTTAALEKEHEHITKI  
. \* : \* : \* : \* : \* : \* : \* : \* : \* : \* : \* : \* : \* : \* : \* : \*

MOF\_DROME KYIDKLQFGNYEIDTWYFSPFPEEYKARTLYVCEYCLKYMFRSSYAYHLHECDRRRPP  
MOF\_ACYPI KYINKVQLGKYEIDTWYFSPFPAEYQKESKIWIICEYCLKYSKLEKSFKYHMSQCTWRQPP  
\*\*\* : \* : \* : \* : \* : \* : \* : \* : \* : \* : \* : \* : \* : \* : \* : \* : \*

MOF\_DROME GREIYRKGNIISIYEVNGKEESLYCQLLCLMAKFLDHLKVLVYFDMDPFLFYILCETDKEGS  
MOF\_ACYPI GVEVYHKGSLSIWEVNSSQHMKYCQLLCLLAKFLDHLKTLVYFDVEPFLFYILCEVDKVG  
\* \* : \* . \* . : \* : \* : \* : \* : \* : \* : \* : \* : \* : \* : \* : \* : \* : \* : \* :

MOZ-SAS

MOF\_DROME HIVGYFSKEKKSLENYNVACILVLPHPQRKGFGLLIAFSYELSRKEGVIGSPEKPLSDL  
MOF\_ACYPI HLVGYFSKEKSDPCNNVACILTMPFPQRQGYGKLLIAFSYELSKLEGLVASPEKPLSDL  
\* : \* : \* : \* : \* : \* : \* : \* : \* : \* : \* : \* : \* : \* : \* : \* : \*

MOF\_DROME GRLSYRSYWAYTLLELMKTRCAPEQITIKELSEMSTHDDIYTLQSMKMIKYWKQNV  
MOF\_ACYPI GKLSYRSYWSVLLLEILKNACGS--LSIKDLSAMTSITQTDIISTLQSMNMVKYWKQHV  
\* . \* : \* : \* : \* : \* : \* : \* : \* : \* : \* : \* : \* : \* : \* : \* : \*

MOF\_DROME ICVTSKTIQDHLQLPQFKQPKLTIIDTDYLVWSPQT-----AAAVVRAPGNSG  
MOF\_ACYPI ICVTPKNVEQLVSSEQYKRPRFILEGSAIKWTPKKYNPRPGPSRHSRSQYLAG  
\*\*\* . \* : : : : . \* : \* . : : . : \* : \* . : : . \* : \* : \* : \* : \*

# MLE (ACYPI003650)

MLE\_DROME -----  
MLE\_ACIPI MANPKAYLHEWCAKNNLELQFETKQAGSNCKPRLFICEVTVTGHNYIGVGNSTNKKLAQA

MLE\_DROME -----  
MLE\_ACIPI NASKDYLLYLTK EGLISIDTYFLPSNCISGPASNGLMVNASQQLMNVVPPKSEYEETSN

MLE\_DROME -----  
MLE\_ACIPI ILGEAYRPNEKTNFQLNDFLNDENNVEEA EGLNLHAAVCGDWTIDNAKSHLNQFIQSNKL

MLE\_DROME -----  
MLE\_ACIPI -----MDIKSFLYQFCAKSQIEPKFDIRQTGPKNRQRFLCEVRVEPTYIGVGNSTN  
KNIDYKYS CNPKTFLHEWCEKNNLEPQFKTKQAGSNRKPRFICEVITGHDIIGIGNSAN  
: \*:\*:\*:\*:\* \*:\*:\*:\*:\* .:\*:\*:\*:\* \*:\*:\*:\*:\* : : \*:\*:\*:\*:\*

MLE\_DROME -----  
MLE\_ACIPI KKD A EKNACRDFVNYLVRV GKLNTNDVPADAGASGGGPR TGLEGAGMAGGSGQQKRVFDG  
IKYAQENASKDFLLYLTRKGLVSTDSLASNC-ISGPASNDLMVNASQKLMNVVPPKSVYQD  
\* \*:\*:\*:\*:\*:\* \*:\* \* \* :\*:\*:\*:\*:\* \* \* . . . : . \* . \* \* : .

MLE\_DROME -----  
MLE\_ACIPI QSGPQDLGEAYRPLNH DGGDGNRYSVIDRIQEQRDMNEAEAFDVNAAIHGNWTIENAKE  
HETPKMLGESYRPV-----GKANFQFNDFLNDENNVEEAHLDVNAAVHGGWTIDNAKS  
: . \* : \*:\*:\*:\*:\* : \* . . . \* : \*:\*:\*:\*:\* \*:\*:\*:\*:\* \*:\*:\*:\*:\* .

MLE\_DROME -----  
MLE\_ACIPI RLNIYKQTNNIRD-DYKYTPVGPEHARSFLAELSIYVPALNRTVTARESGSNKKSASKSC  
RLNQFIQSNKLNKNTDYKYSFIG---KSHVAELSIYIAKLRNVTARESGLNKRSASTSC  
\*\*\* : \*:\*:\*:\*:\* \*:\*:\*:\*:\* : \* . \*:\*:\*:\*:\* . \* . \*:\*:\*:\*:\* \* \* \* \* \* \*

MLE\_DROME -----  
MLE\_ACIPI ALSLVRQLFHLNVIEPFGSLTKKKKDEQLKPYPVKLSPNLINKIDEVIKGLDLPVVPNPRN  
ALS FIRQLYHLGVIEPFGSLKKSILNTVKPYEVNVDPLILNKVYNILOEFNIEPVIKND  
\*\*\* : \*:\*:\*:\*:\* \* \* \* \* \* \* \* : : \* \* \* \* \* \* \* : \* \* \* \* \* : : : \* . .

MLE\_DROME -----  
MLE\_ACIPI IKIELDGPPIPLIVNLSRIDSSQQDGEKROESSVIPWAPPQANWNTWHACNIDEGELATT  
TIIPEP-TTISLISNQLAEFKELKPIKL--SRAILWSPPQPNWNPWLAINIDEGPLATA  
\* \* : . \* . \* \* \* . : . : . \* \* . \* \* \* \* \* \* \* \* \* \* \* \* \* \* \* \*

MLE\_DROME -----  
MLE\_ACIPI SIDDLSMDYERSLRDRRQNDNEYRQLEFREKLPIAAMRSEILTAINDPVVIIRGNTGC  
TLDQLSEELAKDYTKKLNSSKGFKESIEMRSQLPVFNKKNEILDIIRKNSIVIIQGSTGC  
:\*:\*:\*:\* : . . . . : . : : \*:\*:\*:\*:\* : . \* \* \* \* \* \* \* \* \* \* \* \* \*

MLE\_DROME -----  
MLE\_ACIPI -----  
DEAD  
GKTTQIAQYILDDYICSGQGGYANIYVTQPRRISAI SVAERVARERCEQLGDTVGYSVRF  
GKTTQVCQFILDEYLNKNDQAYCNI ICTQPRKISAI SADRVAFERKEDIGLSVGYSVRF  
\* \* \* \* \* : . \* : \* \* \* \* \* : . \* \* \* \* \* \* \* \* \* \* \* \* \* \* \* \* \* \* \* \* \*

MLE\_DROME -----  
MLE\_ACIPI ESVFPRPYGAILFCTVGVLLRKL EAGLRGVSHIIVDEIHERDVNSDFLLVILRDMVDTP  
DSIFPRSTGAILFCTVGVLLRKL ENGMRGISHVIVDEIHERGVNSDFLMVVLKDMVYNYP  
:\*:\*:\*\* . \* \* \* \* \* \* \* \* \* \* \* \* \* \* \* \* \* \* \* \* \* \* \* \* \* \* \* \* \* \*

MLE\_DROME -----  
MLE\_ACIPI DLHVILMSATIDTTKFSKYFGICPVLEVPGRAFPVQQFFLEDIIQMTDFVPSAESRRKRK  
DLRVIFMSATINTAMF SKYFNCCPVIDIKGRCYPVKEYFLEDIVQVLNYQPTDIKKRMN  
\* \* . \* \* : \* \* \* \* \* \* \* : \* \* \* \* \* : \* \* \* \* \* \* \* : : \* : . . . .

MLE\_DROME -----  
MLE\_ACIPI -----  
EVEDEEQLLSEDKDEAEINYNKVCEDKYSQKTRNAMAMLSSESDVSFELLEALLMHIKSK-  
KDYDDEYVI--DAQDHEENCNLLVSDDYPPEVKSVALISEKYVDFEIEALLTHIEIKM  
: \* . \* : : \* : : \* \* \* : . \* . \* . . . . : \* : \* \* \* \* \* \* \* \* \* \* \* \*

Helicase C

MLE\_DROME NIPGAILVFLPGWNLI FALMKFLQNTNIFGDTSQYQILPCHSQIPRDEQRKVFEPVPEGV
MLE\_ACYPI NIPGAVLIFLPGWTLISALQKYLTEKQFFA-SSKFCVLP LHSQLPCADQRRVFEPVPSGV
\*\*\*\*\*:\*\*\*\*\*.\* \*\* \*:\* .:.\* .:.\* :.\* \*\*\*\*\*.\* :\*.\*\*\*\*\*.\*

MLE\_DROME TKIILSTNIAETSITIDDIVFVIDICKARMKLF TSHNNLTSYATVWASKTNLEQRKGRAG
MLE\_ACYPI RKVILSTNIAETSITIDDVVFVINYGKAKIKFFTSHNNMTHYATVWASKTNMQQRKGRAG
\*:\*\*\*\*\*.\*:\*\*\*\*\*.\* \*.:\*:\*\*\*\*\*.\* \*\*\*\*\*.\*:\*\*\*\*\*.\*

MLE\_DROME RVRPGFCFTLCSRARFQALEDNLTPEMFRTP LHEMALTIKLLRLGSIHHFLSKALEPPP V
MLE\_ACYPI RVSDGFCFHLCTKARYDKMDDHVTPEMFRSPLHEIALSIKLLRLGDIGQFLSKAIEPPPI
\*\* \*\*\*\* \*.:\*.: .:.\*:\*\*\*\*\*.\*:\*\*\*\*\*.\*:\*\*\*\*\*.\* \*.:\*\*\*\*\*.\*:\*\*\*\*\*.\*

MLE\_DROME DAVIEAEVLLREMRCIDANDELTP LGRLLARLPIEPRIGKMMVLGAVFGCADLMAIMASY
MLE\_ACYPI DAVNEALVMLKEMKCLGINEELTPLGRILAKLPVEPQIGRMMVLGNIILMGDAFAI IAAI
\*\*\* \*\* \*.:\*.\*.\*. \*:\*\*\*\*\*.\*:\*\*\*.\*:\*. \*.:\*.\* \*\*\*\*\* .: .\* :\*.:\*:

HA2

MLE\_DROME SSTFSEVFSLDIGQRRLANHQALSGTKCS DHVAMIVASQMWRREKQRGEHMEARFCDWK
MLE\_ACYPI CSNMTDIFVFD--HRMTPAQRAFSGNRCS DHLALLNAFQQW-QSLDYCNINPTEYCERK
.\*.:\*.:\* \* \* .:.\* \*.:\*.\*.\*\*\*\*\*.\*: \* \* \* .. : : :\*.:\*:

MLE\_DROME GLQMSTMNVIWDAKQQLDLLLQQAGFP EECMISHEVDERID-GDDPVL DVSLALLCLGLY
MLE\_ACYPI MLSEPSLTTADAMEQLKDLFIKIGFPEI CF EKQRFDFGVEMHDDPLLDVVSAILTMGFY
\* . :\*.:. \*\* :\* \*\* : : \*\*\*\* \* : . : \* : : \* :\*.\* \* :\* :\*:

OB NTP BIND

MLE\_DROME PNICVHKEKRKVLTTESKAALLHKTSVNC SN-LAVTFPYPFFVFGEKIRTRAVSCKQLSM
MLE\_ACYPI PNVCYHKV KRKVYTTTEGKFALIHKTSVNCNNTMDGSFQS PFFVFAEKVRTTAVSCKQMTM
\*\*:\* \*\* \*\*\*\*\* \*\*.\* \*:\*\*\*\*\*.\* \* : : \* \*\*\*\*\*.\*:\* \* \*\*\*\*\*.:\*

MLE\_DROME VSPLQVILFGSRKIDLAANNIVRVDNWLNF DIEPELAAKIGALKPALEDLITVACDNPSD
MLE\_ACYPI VTPIHLLLFGARKIEY-TKELVQLDNWINLKMDV TAASAIVALRPAIESLIVHASEE PGS
\*.:\*.:\*:\*:\*:\*: .:.\*.:\*:\*:\*:\*. :\* : \* \*\*.\*:\*.\*. \*.:\*.:.

MLE\_DROME ILRLEEPYAQLVKVVKDLCVKSAGDFLQRESG ILPHQSRQFS DGGGPPKRGRFETGRFT
MLE\_ACYPI IAMLSETDIKLINVLKELCNFNCGRYNLSPIT-----FVQGDRPNYRRPF-----
\* \*.\*. :\*.:\*:\*:\*.\* ..\* .:.\*. : \* :\*.\* \* \* \*

MLE\_DROME NSSFGRNGRRTFGGGYGNNGGGYGNNGGGY GNIGGGYGNNAGGYGNNGGYGNNGGGYRN
MLE\_ACYPI NQTFNESGDAS-----DNKVQHINHSHSSYNSFQ RG---GRGRYNEGIGYRGNSSSLCD
\*.:\*.\* \*.:. .:\* : .: .\*.:\* \* . \* \*.:\* \*\* \*.:\* .:

MLE\_DROME NGGGYGNNGGYGNKRGFGDSFESNRGSGGGFRNGDQGGRWGNF
MLE\_ACYPI EYNQRTYHDGGRSVREQGF-----TGYRSENGFKRC-----F
: . :\*.\* . . \*\* :. \* .\*.\*. \*
