# Supplementary material for: Dosage compensation and sex-specific epigenetic landscape of the X chromosome in the pea aphid
Source: PubMed Central journal article supplement (PMC5471693; doi:10.1186/s13072-017-0137-1), 2017-06-15
Supplement: 13072_2017_137_MOESM7_ESM.pdf [file 13072_2017_137_MOESM7_ESM.pdf]

**Additional file 7: Protein conservation of the Drosophila's DCC in the pea aphid.**

Proteic domains percentage of identity between *A. pisum* homologs of the five proteins composing the DCC in *D. melanogaster*.

| <i>D. melanogaster</i><br>protein name | <i>A. pisum</i><br>homologs | Proteic<br>domains | <i>A. pisum and D. melanogaster</i><br>domain identity |
|----------------------------------------|-----------------------------|--------------------|--------------------------------------------------------|
| MSL1_DROME                             | XM_003243415.1              | PEHE               | 0.28                                                   |
| MSL2_DROME                             | ACYPI49193                  | zf-RING10          | 0.25                                                   |
|                                        |                             | MSL2-CXC           | 0.32                                                   |
| MSL3_DROME                             | ACYPI000966                 | MRG                | 0.22                                                   |
| MOF_DROME                              | ACYPI002102                 | MOZ-SAS            | 0.67                                                   |
| MLE_DROME                              | ACYPI003650                 | dsrm               | 0.45                                                   |
|                                        |                             | DEAD               | 0.68                                                   |
|                                        |                             | Helicase_C         | 0.69                                                   |
|                                        |                             | HA2                | 0.43                                                   |
|                                        |                             | OB NTP BIND        | 0.57                                                   |
